# Supplementary material
Source: publisher figshare collection journal article supplement (https://acs.figshare.com/ndownloader/files/8616487)
Supplement: Supplementary file 1 [file 8616487]

## Supporting Information

### Effect of Composition Asymmetry on the Phase Separation and Crystallization in Double Crystalline Binary Polymer Blends: A Dynamic Monte Carlo Simulation Study

Ashok Kumar Dasmahapatra<sup>\*</sup>

Department of Chemical Engineering, Indian Institute of Technology Guwahati,  
Guwahati - 781039, Assam, India

**Figure S1. Snapshots at  $U_p = 0$  for various compositions,  $x_B$ : (a) 0.125, (b) 0.375, (c) 0.5, (d) 0.625 and (e) 0.875. Blue and magenta colors represent bonds of A- and B-polymers, respectively.**

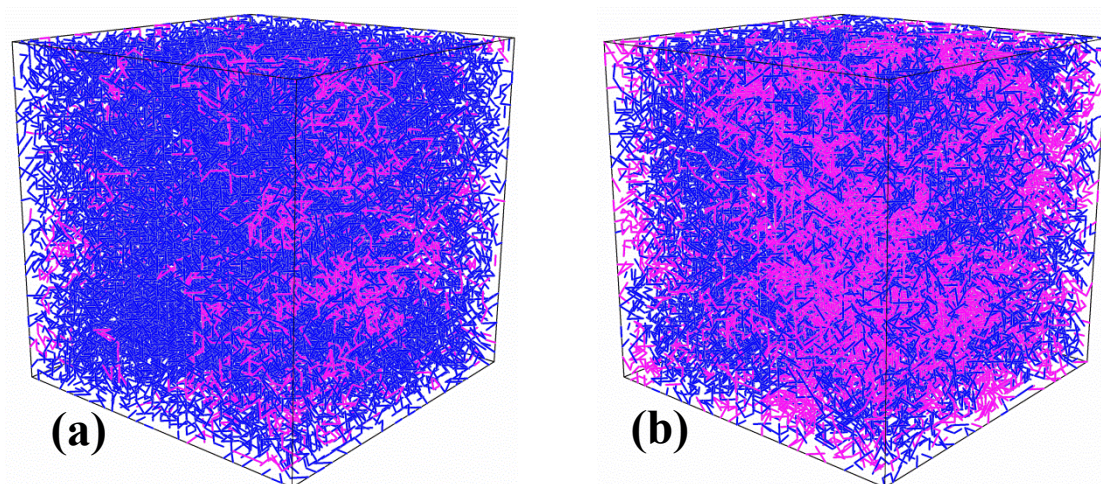

<sup>\*</sup> Corresponding author: Phone: +91-361-2582273, Fax: +91-361-2582291, Electronic mail: [akdm@iitg.ernet.in](mailto:akdm@iitg.ernet.in)

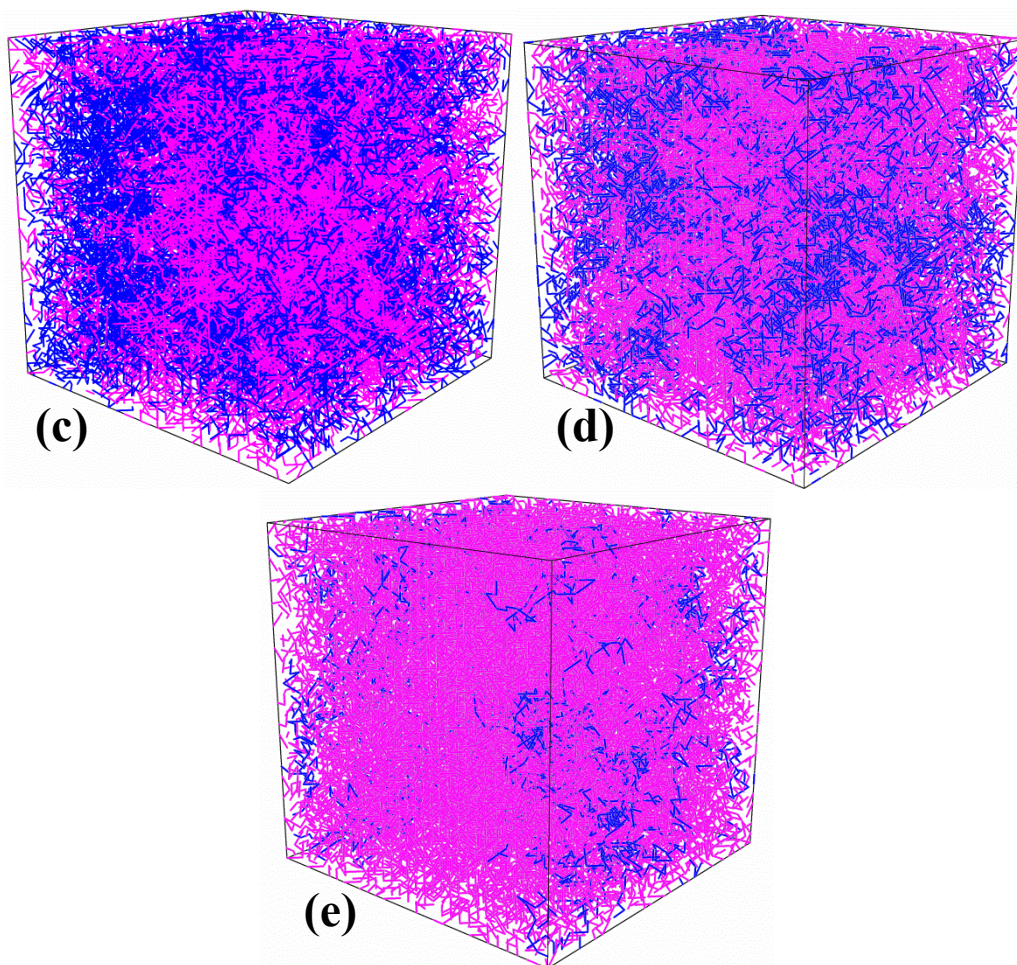

**Figure S2.** Change in mean square displacement of center of mass ( $d_{cm}^2$ ) with  $U_p$  for A- and B-polymers: (a)  $d_{cm\_A}^2$  vs.  $U_p$  at  $\lambda = 1$ , (b)  $d_{cm\_A}^2$  vs.  $U_p$  at  $\lambda = 6$ , (c)  $d_{cm\_B}^2$  vs.  $U_p$  at  $\lambda = 1$ , (d)  $d_{cm\_B}^2$  vs.  $U_p$  at  $\lambda = 6$ .

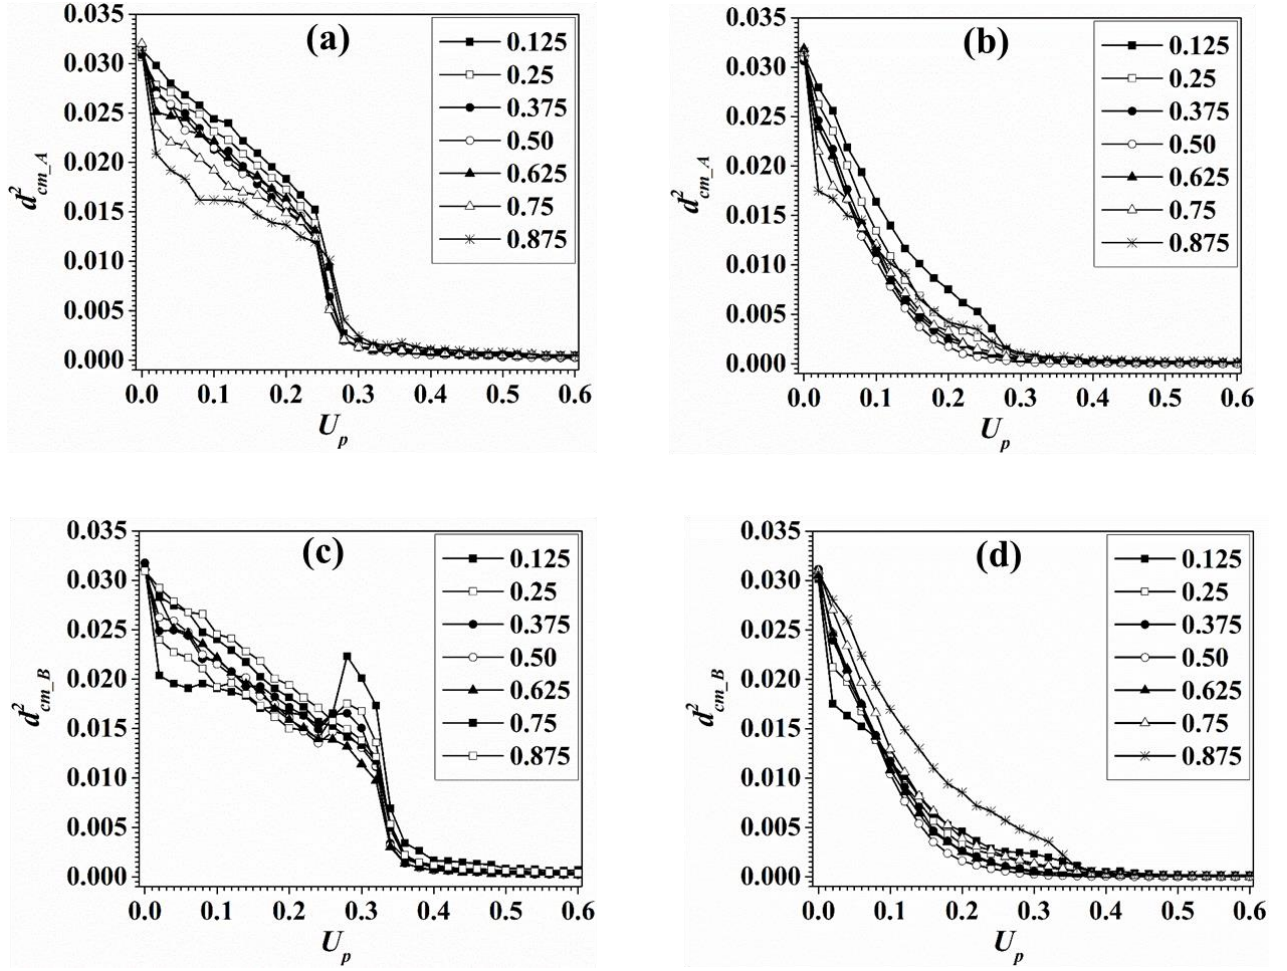



**Figure S3. Snapshots of macrophase separated melt at  $U_p = 0.1$  during non-isothermal crystallization, for various compositions and  $\lambda$ : (a)  $\lambda = 1$ ,  $x_B = 0.125$ , (b)  $\lambda = 1$ ,  $x_B = 0.375$ , (c)  $\lambda = 1$ ,  $x_B = 0.5$ , (d)  $\lambda = 1$ ,  $x_B = 0.625$ , (e)  $\lambda = 1$ ,  $x_B = 0.875$ , (f)  $\lambda = 6$ ,  $x_B = 0.125$ , (g)  $\lambda = 6$ ,  $x_B = 0.375$ , (h)  $\lambda = 6$ ,  $x_B = 0.5$ , (i)  $\lambda = 6$ ,  $x_B = 0.625$  and (j)  $\lambda = 6$ ,  $x_B = 0.875$ . Blue and magenta colors represent bonds of A- and B-polymers, respectively.**

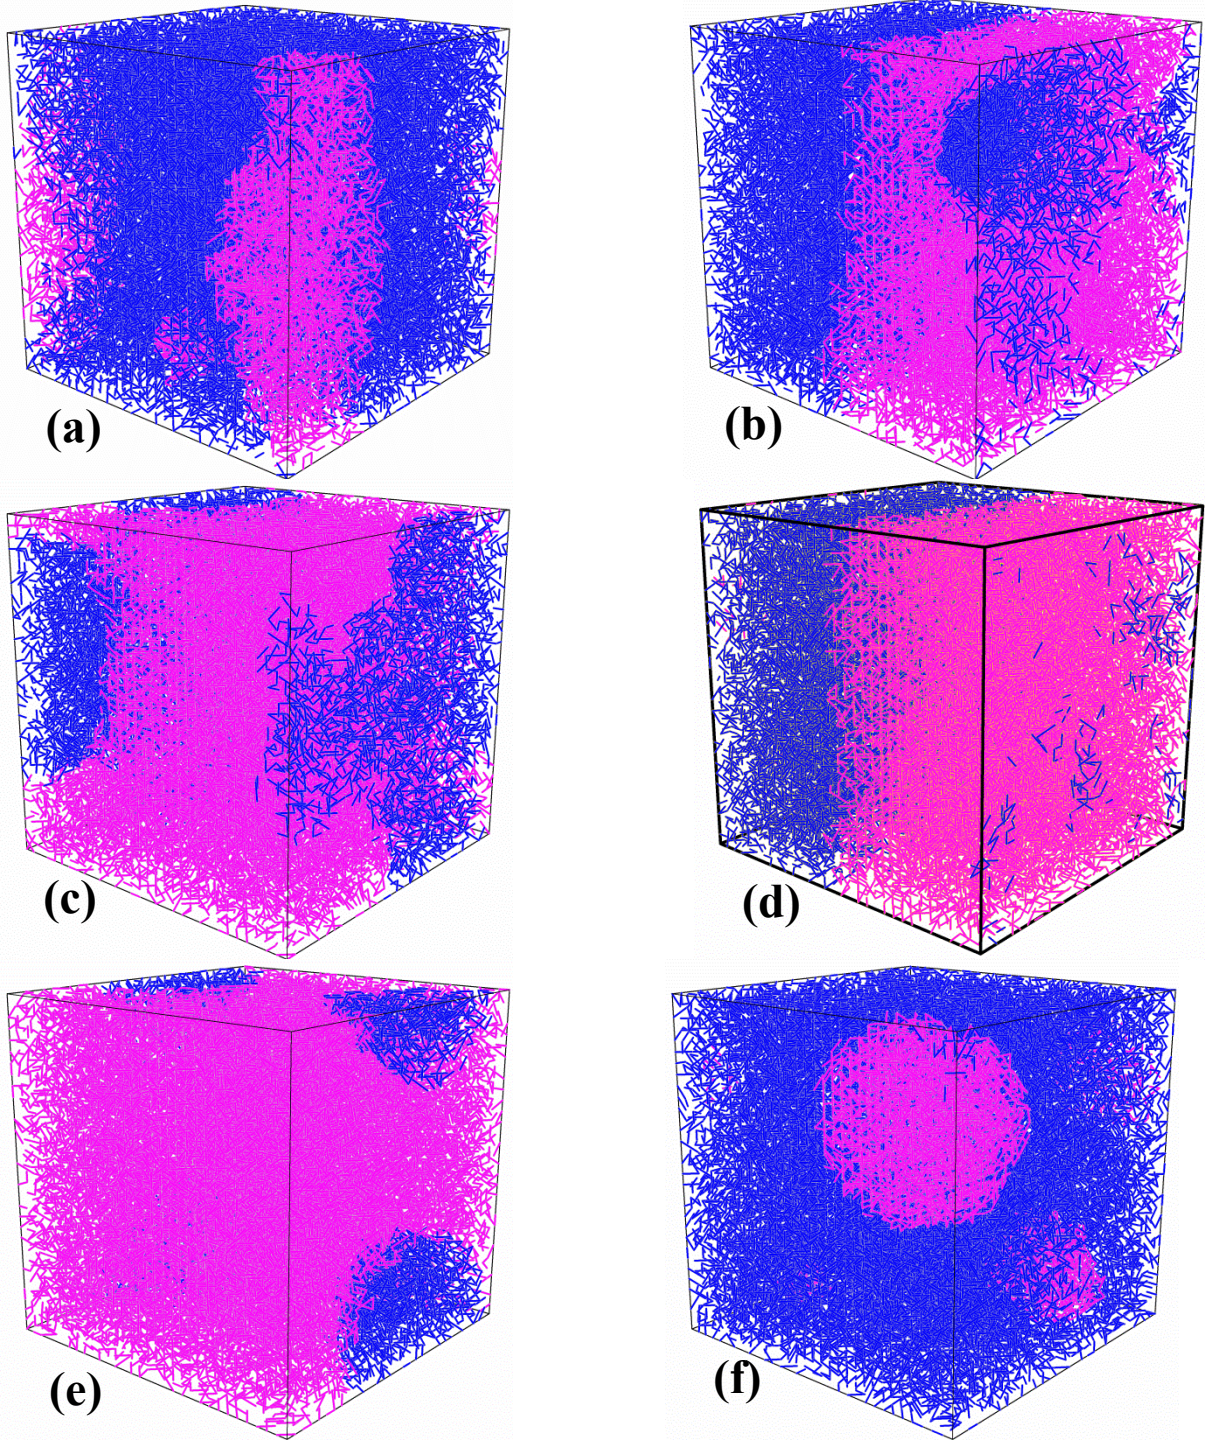



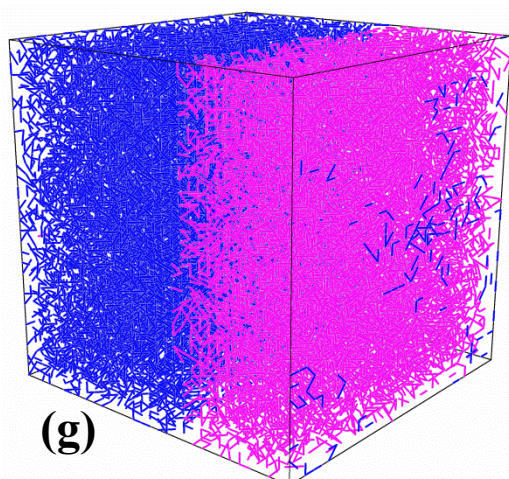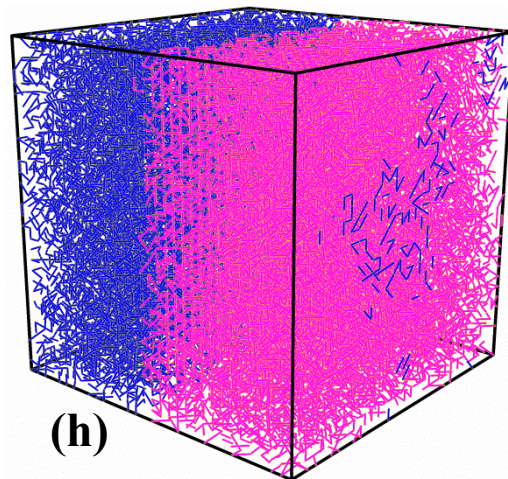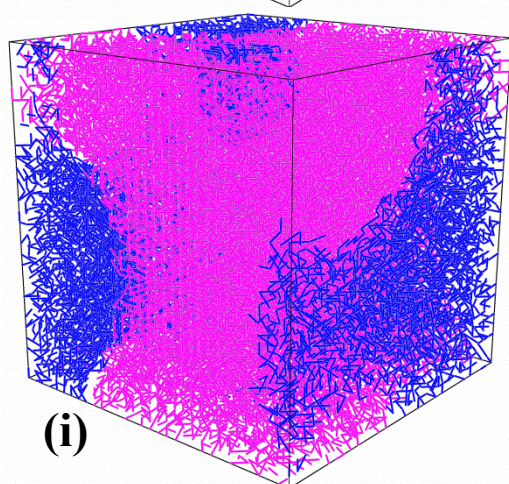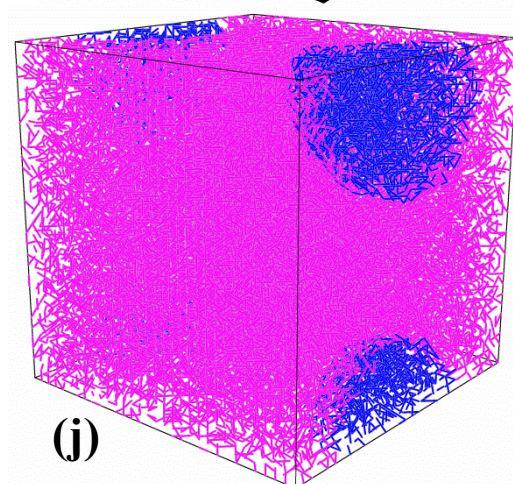



**Figure S4. Snapshots of semicrystalline structure at  $U_p = 0.28$  during non-isothermal crystallization for various compositions at  $\lambda = 1$ : (a)  $x_B = 0.125$ , (b)  $x_B = 0.25$ , (c)  $x_B = 0.375$ , (d)  $x_B = 0.50$ , (e)  $x_B = 0.625$ , (f)  $x_B = 0.75$ , (g)  $x_B = 0.875$ . Blue and magenta colors represent crystalline bonds of A- and B-polymers, respectively. Yellow color represents non-crystalline bonds of both the polymers.**

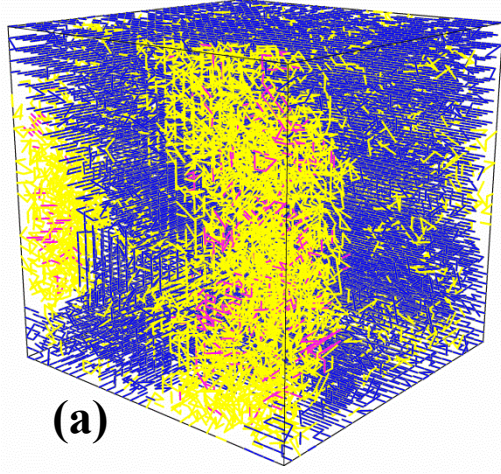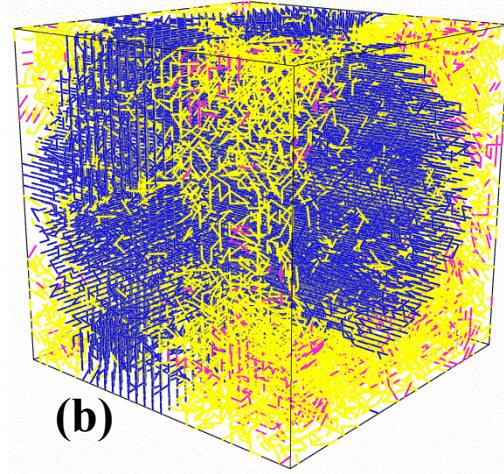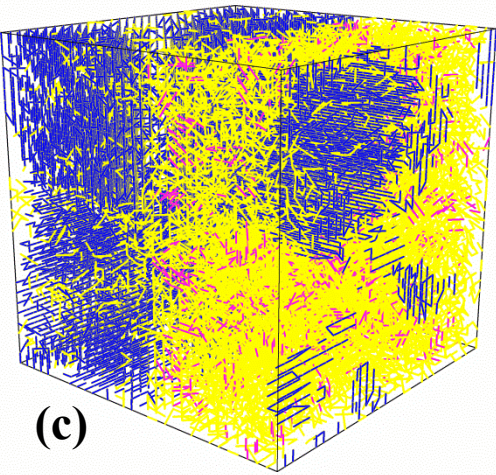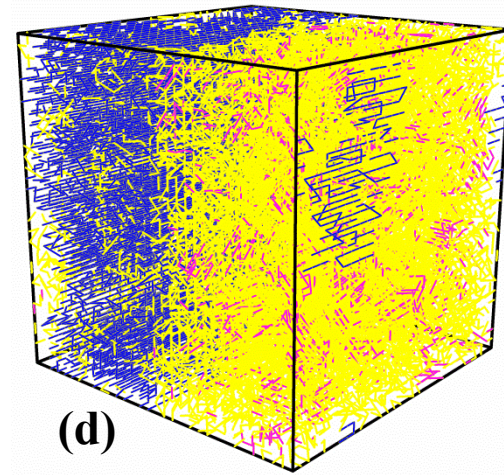

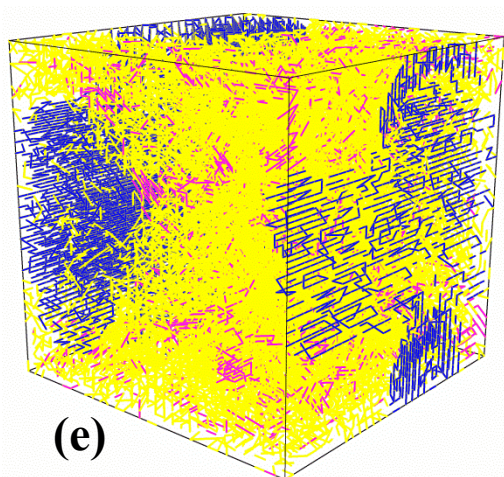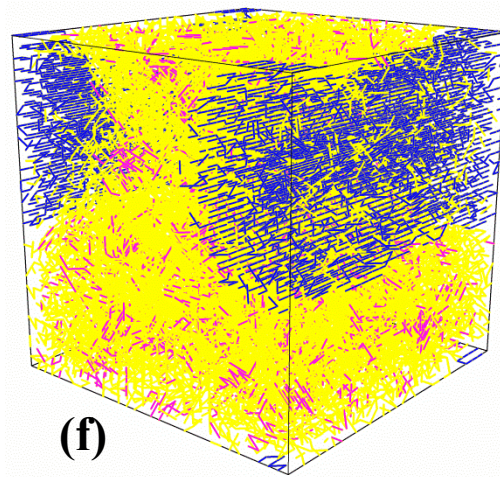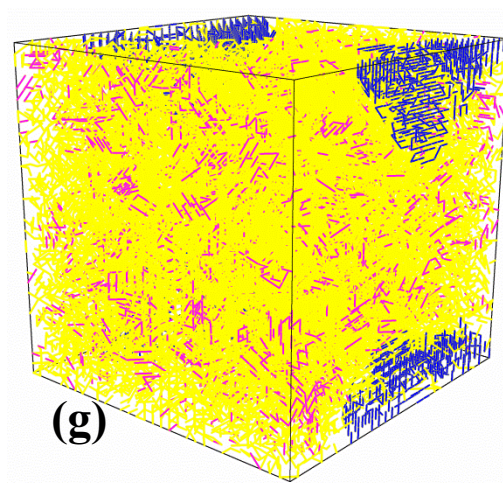



**Figure S5. Change in crystallinity with  $U_p$  for A- and B-polymers: (a)  $X_A$  vs.  $U_p$  at  $\lambda = 1$ , (b)  $X_A$  vs.  $U_p$  at  $\lambda = 6$ , (c)  $X_B$  vs.  $U_p$  at  $\lambda = 1$ , (d)  $X_B$  vs.  $U_p$  at  $\lambda = 6$ .**

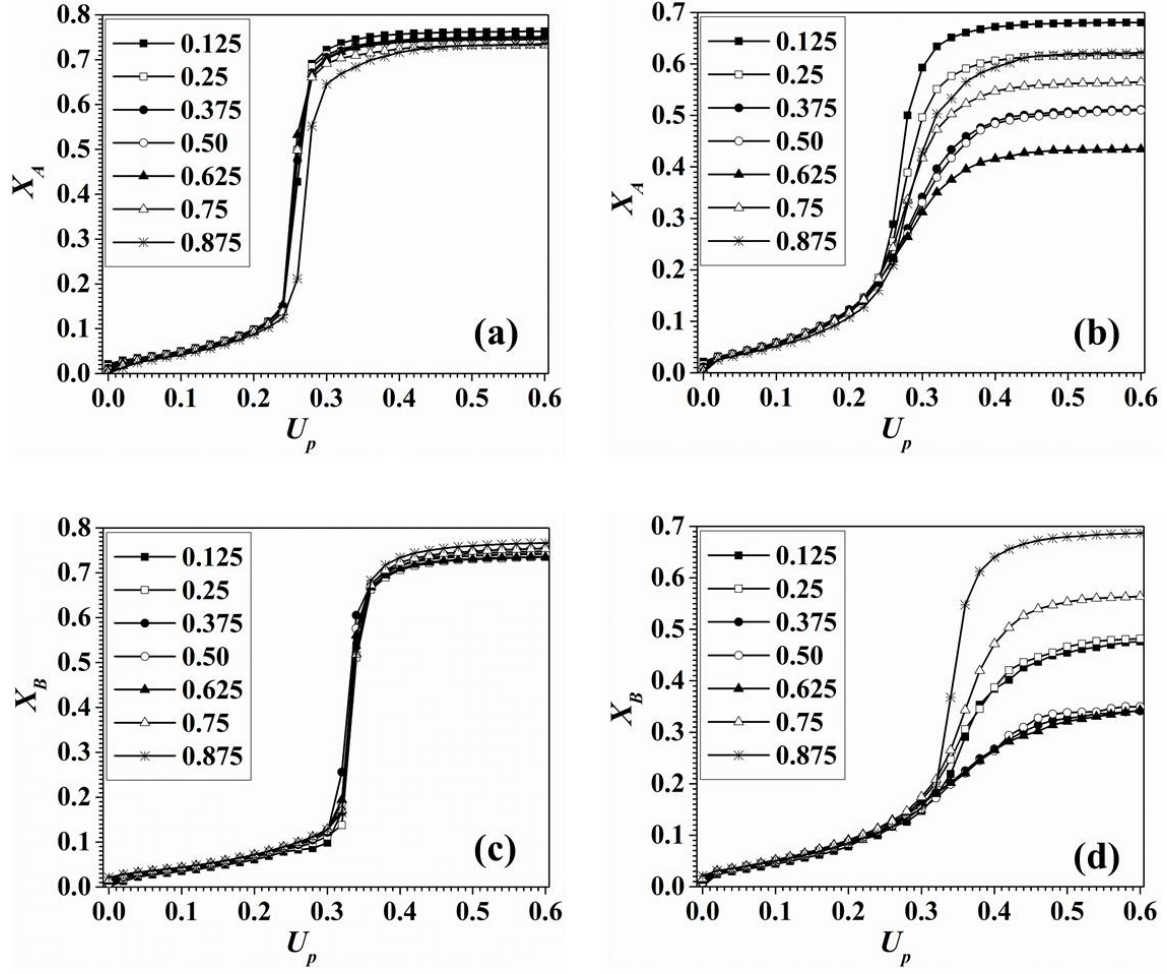



**Figure S6. Snapshots of crystalline structure at  $U_p = 0.6$  during non-isothermal crystallization, for various compositions and  $\lambda$ : (a)  $\lambda = 1$ ,  $x_B = 0.125$ , (b)  $\lambda = 1$ ,  $x_B = 0.375$ , (c)  $\lambda = 1$ ,  $x_B = 0.5$ , (d)  $\lambda = 1$ ,  $x_B = 0.625$ , (e)  $\lambda = 1$ ,  $x_B = 0.875$ , (f)  $\lambda = 6$ ,  $x_B = 0.125$ , (g)  $\lambda = 6$ ,  $x_B = 0.375$ , (h)  $\lambda = 6$ ,  $x_B = 0.5$ , (i)  $\lambda = 6$ ,  $x_B = 0.625$  and (j)  $\lambda = 6$ ,  $x_B = 0.875$ . Blue and magenta colors represent crystalline bonds of A- and B-polymers, respectively. Yellow color represents non-crystalline bonds of both the polymers.**

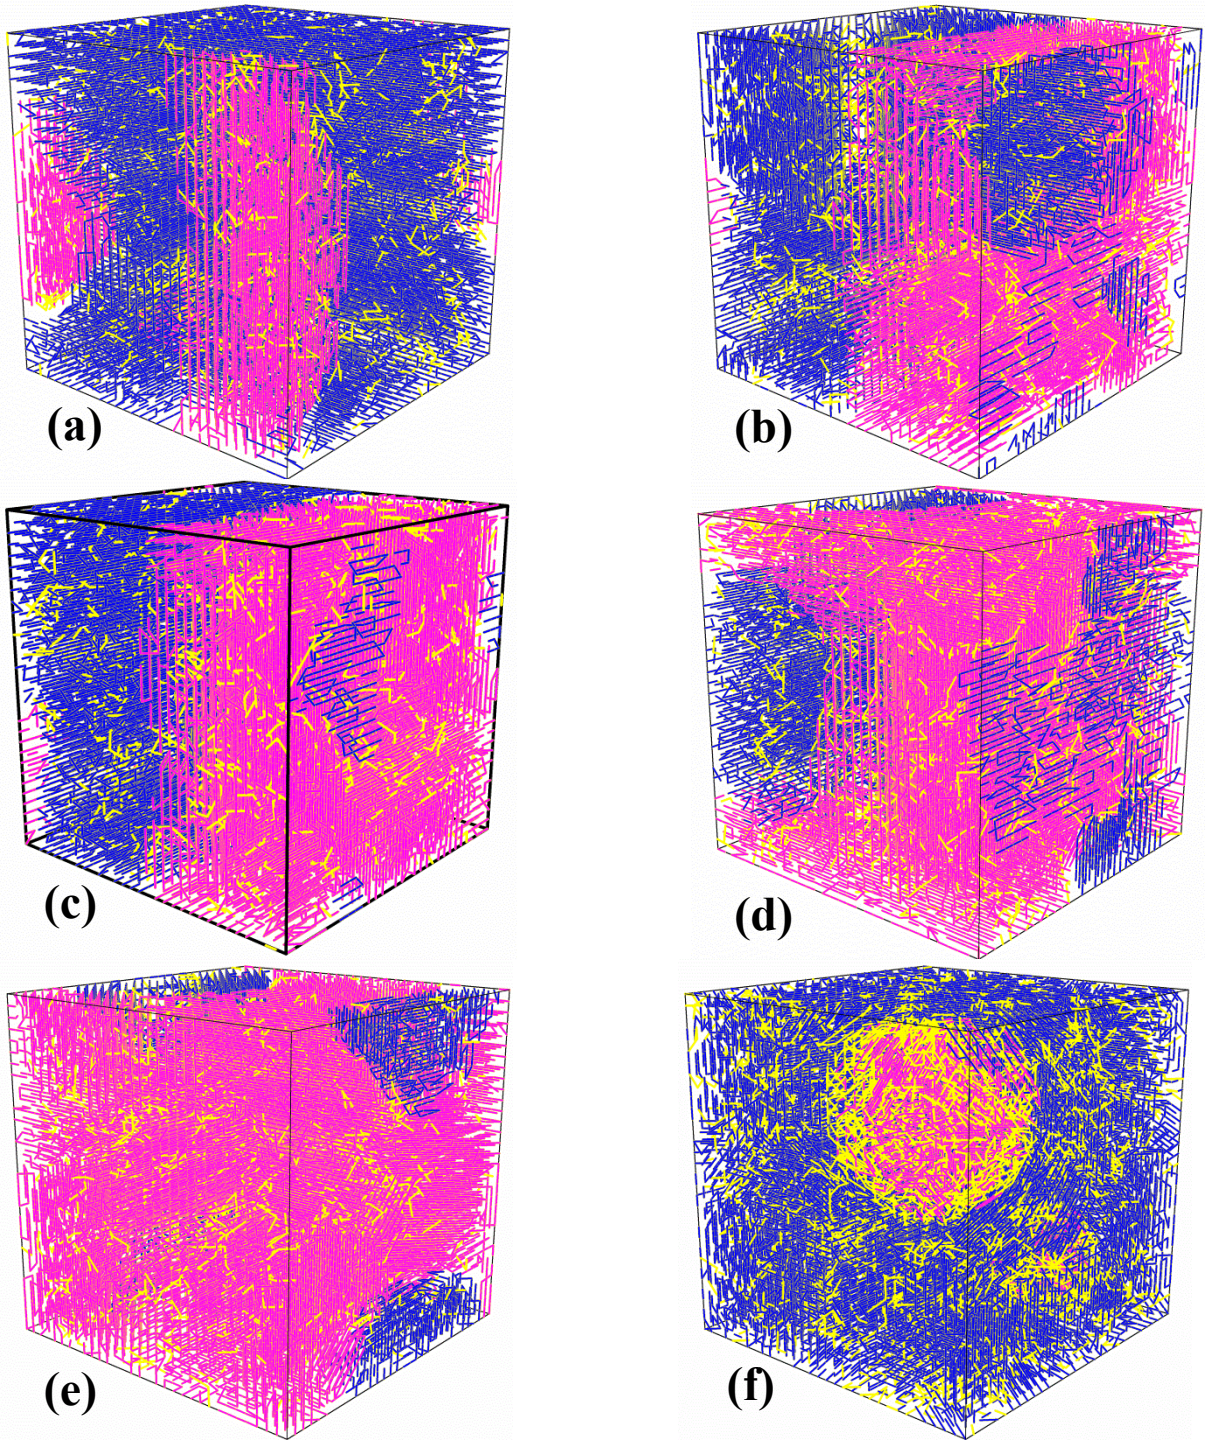



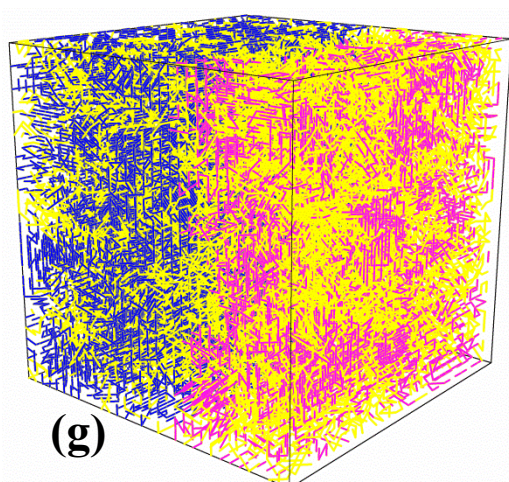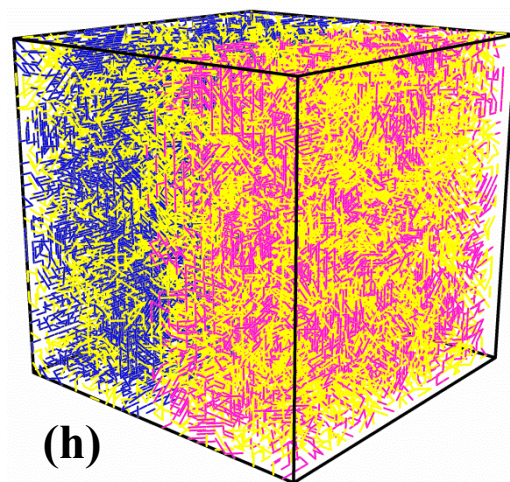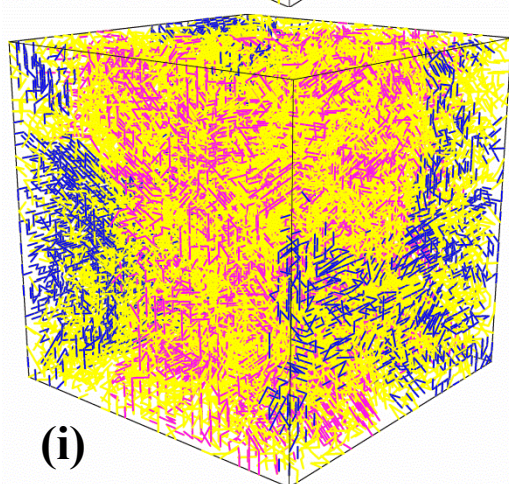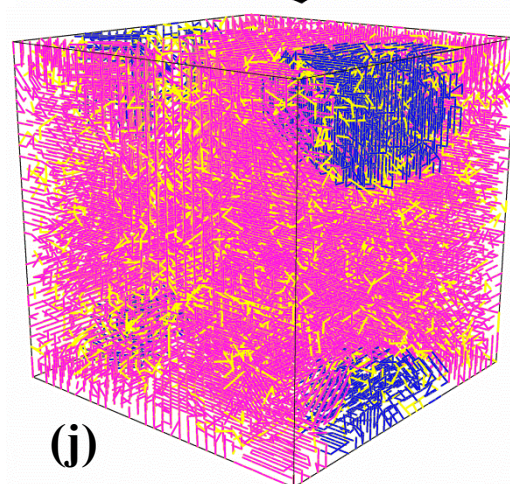



**Figure S7. Change in average crystallite size with  $U_p$  for A- and B-polymers: (a)  $\langle S_A \rangle$  vs.  $U_p$  at  $\lambda = 1$ , (b)  $\langle S_A \rangle$  vs.  $U_p$  at  $\lambda = 6$ , (c)  $\langle S_B \rangle$  vs.  $U_p$  at  $\lambda = 1$ , (d)  $\langle S_B \rangle$  vs.  $U_p$  at  $\lambda = 6$ .**

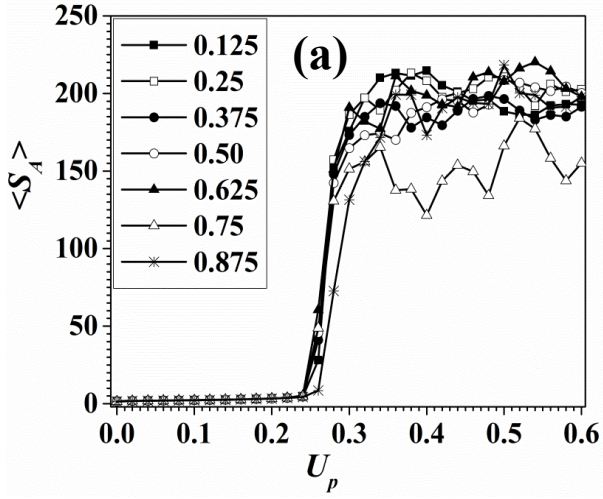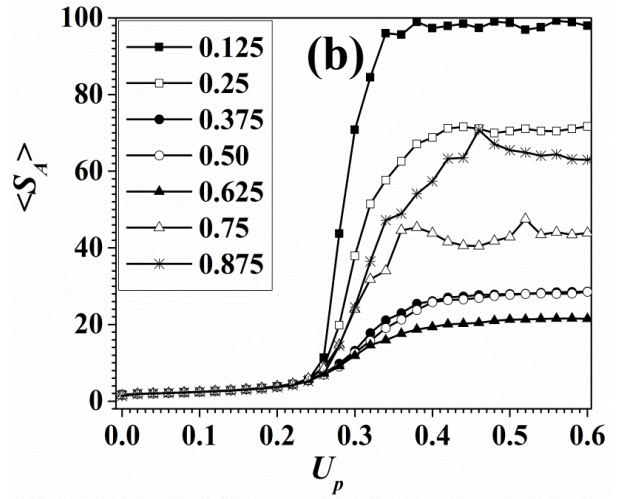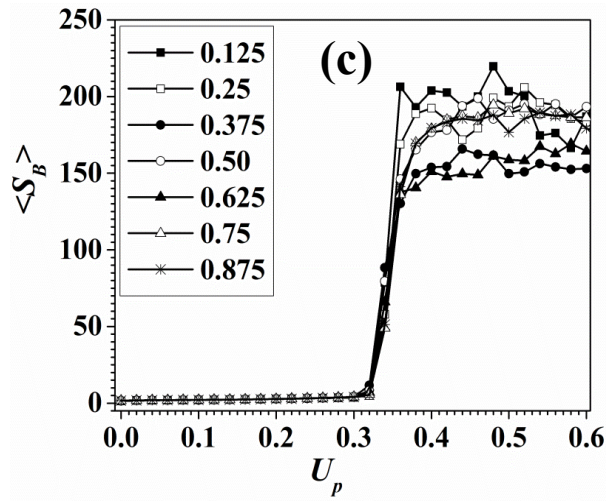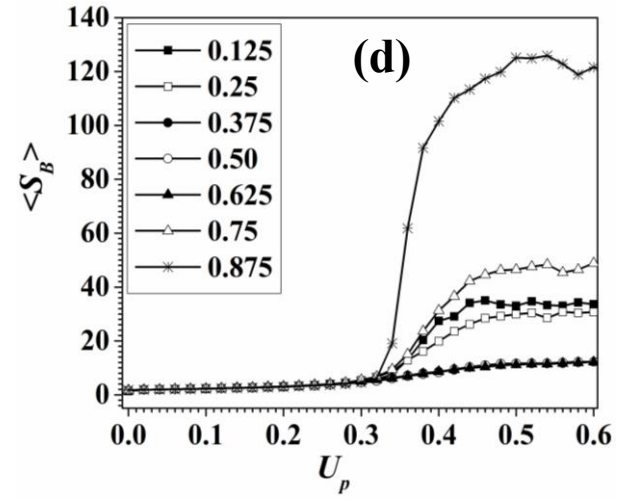

**Figure S8. Change in average lamellar thickness with  $U_p$  for A- and B-polymers: (a)  $\langle l_A \rangle$  vs.  $U_p$  at  $\lambda = 1$ , (b)  $\langle l_A \rangle$  vs.  $U_p$  at  $\lambda = 6$ , (c)  $\langle l_B \rangle$  vs.  $U_p$  at  $\lambda = 1$ , (d)  $\langle l_B \rangle$  vs.  $U_p$  at  $\lambda = 6$ .**

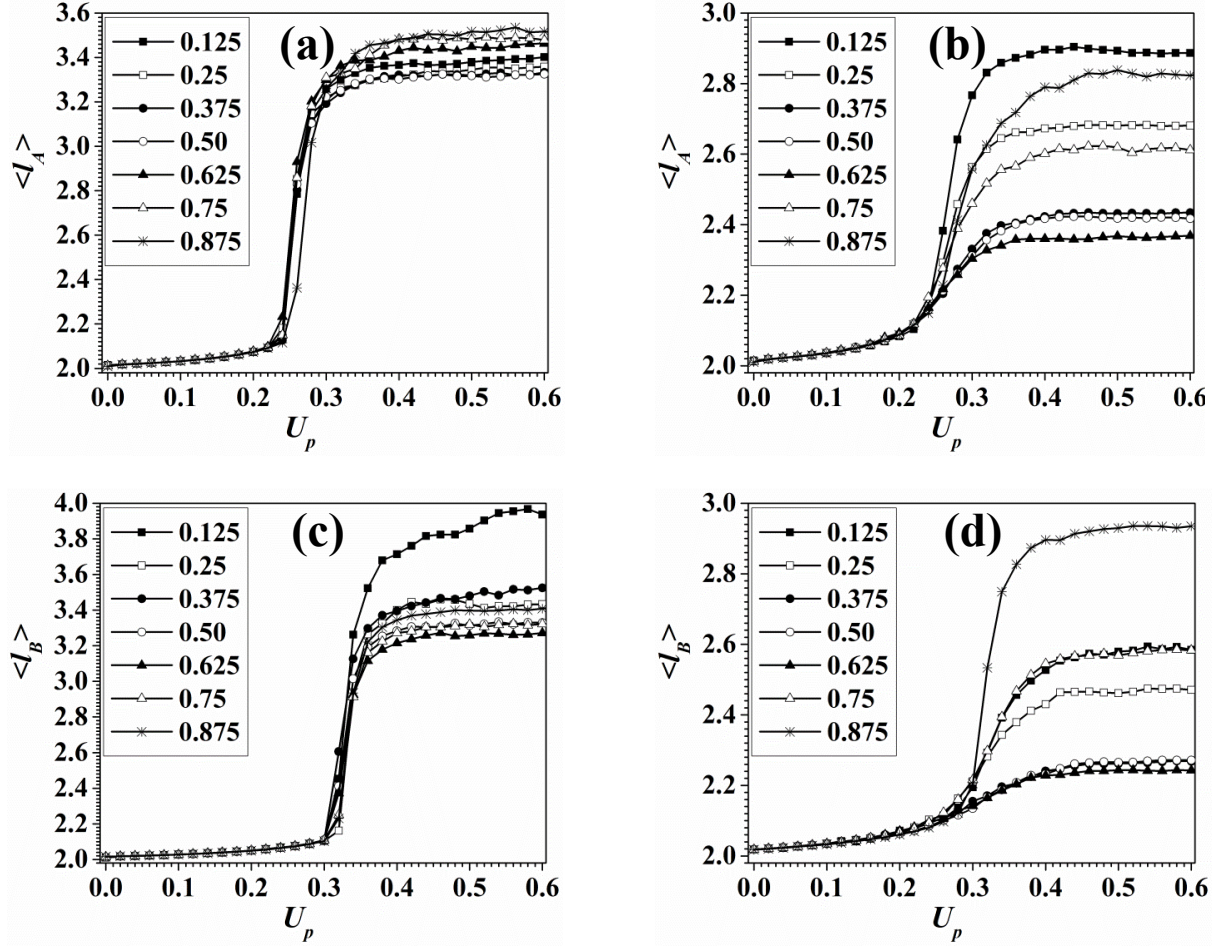



**Figure S9. Change in isothermal overall crystallinity with number of Monte Carlo steps (MCS) at (a)  $\lambda = 1$  and (b)  $\lambda = 6$ .**

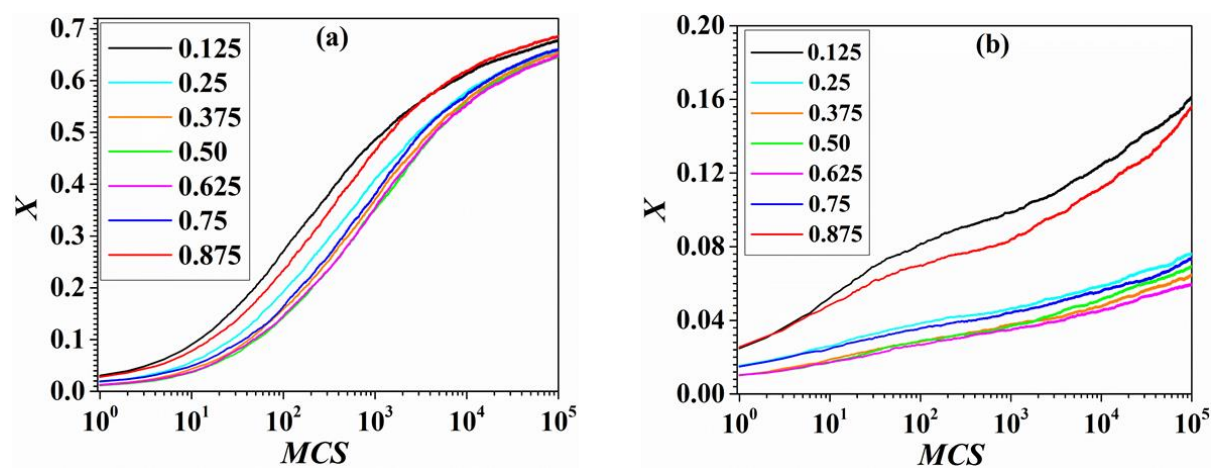

**Table S1. Comparison in saturated crystallinity of A-polymer,  $X_A$ , B-polymer,  $X_B$ , with composition,  $x_B$ , during one-step isothermal crystallization, at  $\lambda = 1$  and 6.**

|                                           | Weak segregation, $\lambda = 1$ |              | Strong segregation, $\lambda = 6$ |              |
|-------------------------------------------|---------------------------------|--------------|-----------------------------------|--------------|
| <b>Composition<br/>(<math>x_B</math>)</b> | $X_A$                           | $X_B$        | $X_A$                             | $X_B$        |
| <b>0.125</b>                              | <b>0.683</b>                    | <b>0.632</b> | <b>0.175</b>                      | <b>0.053</b> |
| <b>0.25</b>                               | <b>0.664</b>                    | <b>0.639</b> | <b>0.085</b>                      | <b>0.048</b> |
| <b>0.375</b>                              | <b>0.660</b>                    | <b>0.639</b> | <b>0.070</b>                      | <b>0.054</b> |
| <b>0.5</b>                                | <b>0.653</b>                    | <b>0.641</b> | <b>0.072</b>                      | <b>0.066</b> |
| <b>0.625</b>                              | <b>0.645</b>                    | <b>0.648</b> | <b>0.051</b>                      | <b>0.064</b> |
| <b>0.75</b>                               | <b>0.645</b>                    | <b>0.663</b> | <b>0.051</b>                      | <b>0.080</b> |
| <b>0.875</b>                              | <b>0.641</b>                    | <b>0.690</b> | <b>0.067</b>                      | <b>0.167</b> |



**Table S2.** Comparison in average lamellar thickness of A-polymer,  $\langle l_A \rangle$ , with composition,  $x_B$ , during one- and two-step isothermal crystallization, at  $\lambda = 1$ .

|                       | Two-step cooling |             | One-step cooling |
|-----------------------|------------------|-------------|------------------|
| Composition ( $x_B$ ) | $U_p = 0.28$     | $U_p = 0.6$ | $U_p = 0.6$      |
| 0.125                 | 3.47             | 3.51        | 2.7              |
| 0.25                  | 3.46             | 3.46        | 2.67             |
| 0.375                 | 3.39             | 3.44        | 2.68             |
| 0.5                   | 3.43             | 3.47        | 2.74             |
| 0.625                 | 3.45             | 3.47        | 2.73             |
| 0.75                  | 3.53             | 3.63        | 2.81             |
| 0.875                 | 3.61             | 3.72        | 2.95             |

**Table S3.** Comparison in average lamellar thickness of B-polymer,  $\langle l_B \rangle$ , with composition,  $x_B$ , during one- and two-step isothermal crystallization, at  $\lambda = 1$ .

|                       | Two-step cooling | One-step cooling |
|-----------------------|------------------|------------------|
| Composition ( $x_B$ ) | $U_p = 0.6$      | $U_p = 0.6$      |
| 0.125                 | 3.00             | 3.01             |
| 0.25                  | 2.83             | 2.85             |
| 0.375                 | 2.79             | 2.79             |
| 0.5                   | 2.78             | 2.74             |
| 0.625                 | 2.77             | 2.74             |
| 0.75                  | 2.78             | 2.75             |
| 0.875                 | 2.86             | 2.80             |

**Table S4. Comparison in saturated crystallinity of A-polymer,  $X_A$ , with composition,  $x_B$ , during one- and two-step isothermal crystallization, at  $\lambda = 6$ .**

|                       | Two-step cooling |             | One-step cooling |
|-----------------------|------------------|-------------|------------------|
| Composition ( $x_B$ ) | $U_p = 0.28$     | $U_p = 0.6$ | $U_p = 0.6$      |
| 0.125                 | 0.623            | 0.668       | 0.175            |
| 0.25                  | 0.397            | 0.473       | 0.085            |
| 0.375                 | 0.294            | 0.335       | 0.070            |
| 0.5                   | 0.384            | 0.426       | 0.072            |
| 0.625                 | 0.358            | 0.422       | 0.051            |
| 0.75                  | 0.276            | 0.329       | 0.051            |
| 0.875                 | 0.429            | 0.523       | 0.067            |

**Table S5. Comparison in saturated crystallinity of B-polymer,  $X_B$ , with composition,  $x_B$ , during one- and two-step isothermal crystallization, at  $\lambda = 6$ .**

|                       | Two-step cooling |             | One-step cooling |
|-----------------------|------------------|-------------|------------------|
| Composition ( $x_B$ ) | $U_p = 0.28$     | $U_p = 0.6$ | $U_p = 0.6$      |
| 0.125                 | 0.126            | 0.342       | 0.053            |
| 0.25                  | 0.144            | 0.243       | 0.048            |
| 0.375                 | 0.145            | 0.180       | 0.054            |
| 0.5                   | 0.151            | 0.250       | 0.066            |
| 0.625                 | 0.143            | 0.259       | 0.064            |
| 0.75                  | 0.150            | 0.246       | 0.051            |
| 0.875                 | 0.137            | 0.523       | 0.167            |
